# Supplementary material for: MFI, BEA and FAU zeolite scavenging role in neonicotinoids and radical species elimination
Source: Royal Society of Chemistry journal article supplement (doi:10.1039/d1em00437a), 2021-12-24
Supplement: d1em00437a1.pdf [file d1em00437a1.pdf]

## Supporting information

### MFI, BEA and FAU Zeolites scavenging role in Neonicotinoides and radical species elimination

M. Milojević-Rakić\*, D. Popadić, A. Janošević Ležaić, A. Jevremović, B. Nedić Vasiljević, S. Uskoković-Marković and D. Bajuk-Bogdanović

\* Corresponding author: [maja@ffh.bg.ac.rs](mailto:maja@ffh.bg.ac.rs)

**Table S1.** The standard curve equation of pesticide by UV/Vis spectrometry.

| Pesticide    | Wavelength (nm) | Calibration curve | Adj. R <sup>2</sup> | Linear range (mg/L) |
|--------------|-----------------|-------------------|---------------------|---------------------|
| Acetamiprid  | 245             | A=0.0094c         | 0.9999              | 1-100               |
| Imidacloprid | 270             | A=0.0088c         | 0.9999              | 1-100               |

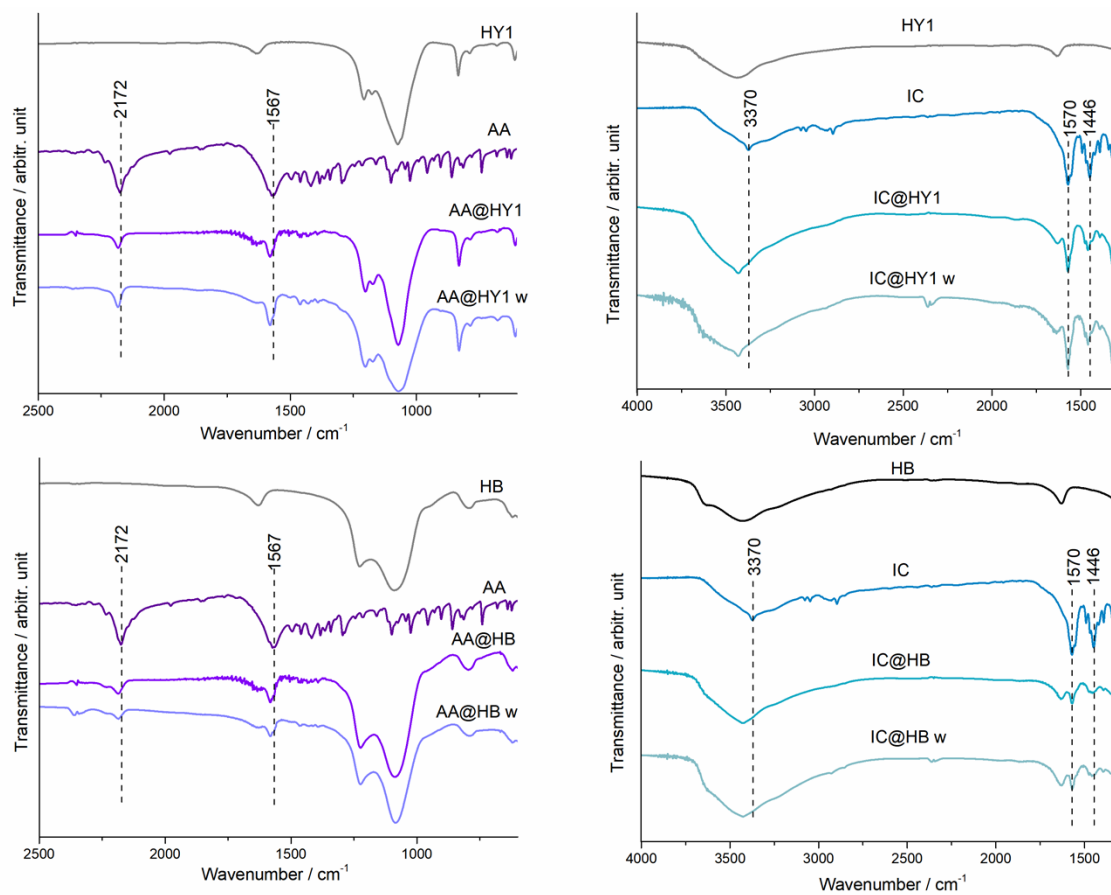

**Figure. S1.** The FTIR spectra of HY1 and HB zeolites, pesticide (AA-left, IC-right) and pesticide saturated HY4 and HB samples, before and after washing.

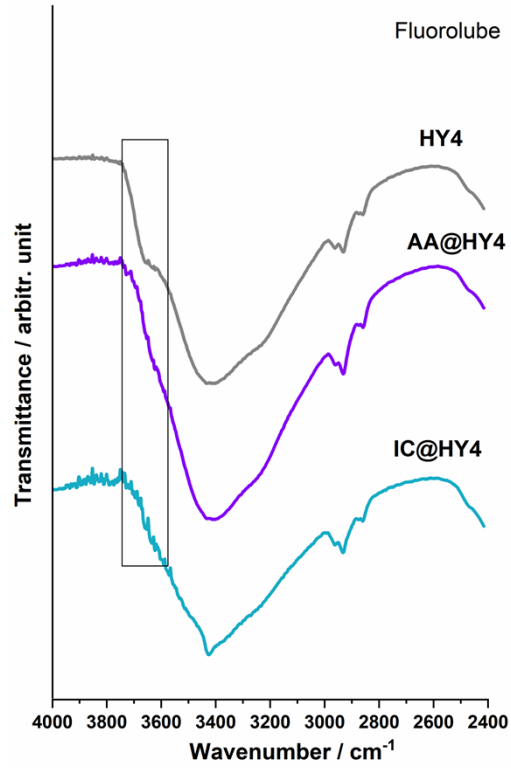

**Figure S2.** FTIR spectra obtained by fluorolube mull method for neat HY4 zeolite and sample after acetamiprid/imidacloprid adsorption.
